# Supplementary material for: 3D morphometric analysis of fossil canid skulls contradicts the suggested domestication of dogs during the late Paleolithic
Source: PubMed Central journal article supplement (PMC5389137; doi:10.1038/srep08299), 2015-02-05

a

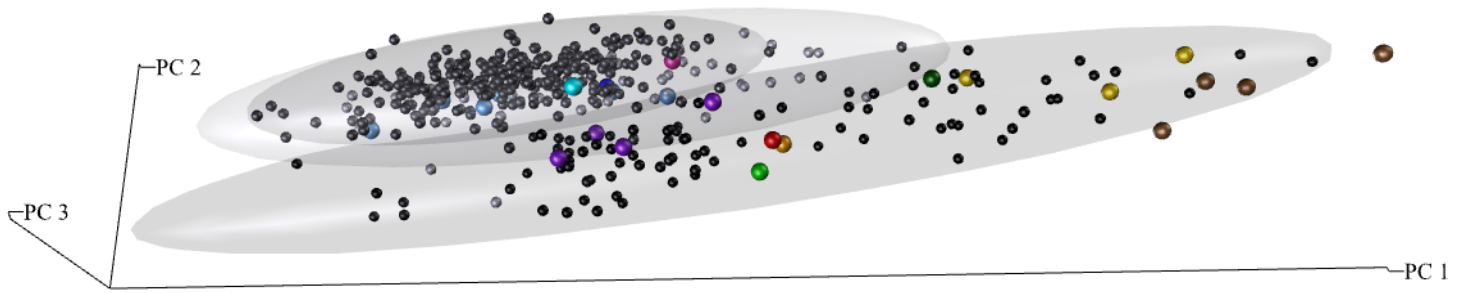

- Alaskan Pleistocene Wolves
- Alaskan Wolves
- Alaskan Recent Fossil Dogs
- Dogs
- Eliseevichi MAE
- European Wolves
- Gallo Dog
- Goyet
- Mummified Dogs
- Neolithic Dogs
- Shamanka II
- Trou Balleux
- Ust'-Belaia
- Wolf-Dog Hybrid

b

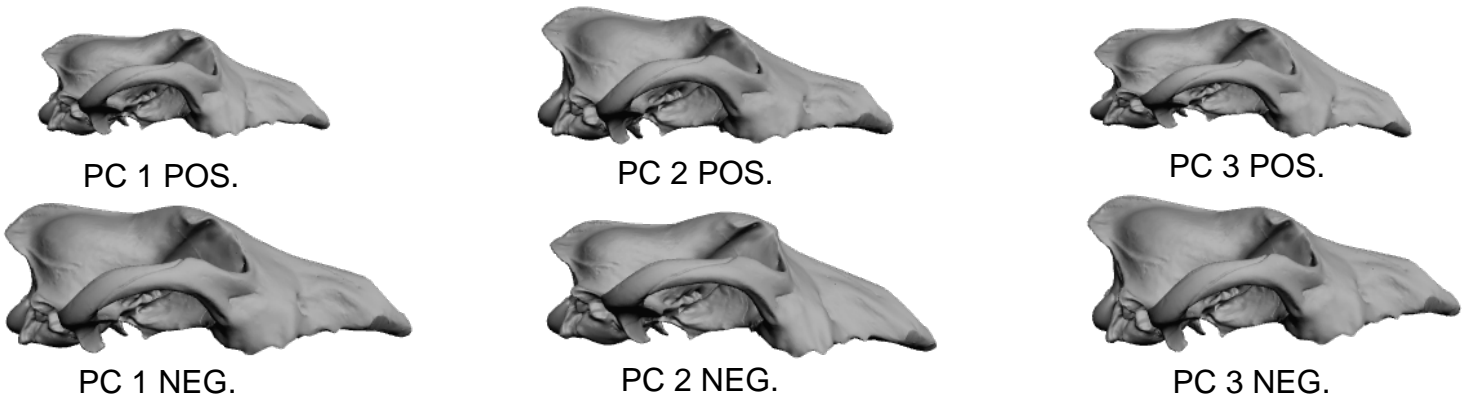

Supplement: srep08299-s2.pdf [file srep08299-s2.pdf]
