# Supplementary material for: 3D morphometric analysis of fossil canid skulls contradicts the suggested domestication of dogs during the late Paleolithic
Source: PubMed Central journal article supplement (PMC5389137; doi:10.1038/srep08299), 2015-02-05

a

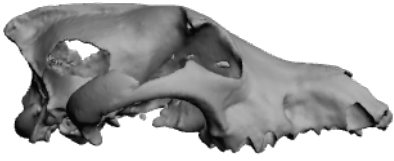

b

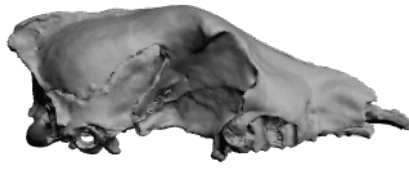

c

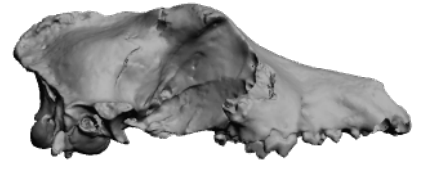

d

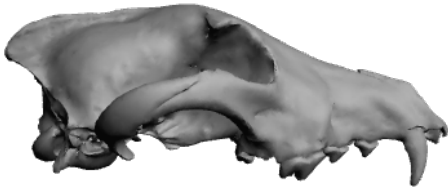

e

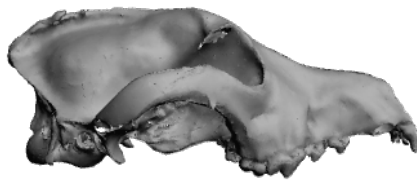

Supplement: srep08299-s3.pdf [file srep08299-s3.pdf]
