# Supplementary material for: 3D morphometric analysis of fossil canid skulls contradicts the suggested domestication of dogs during the late Paleolithic
Source: PubMed Central journal article supplement (PMC5389137; doi:10.1038/srep08299), 2015-02-05

a

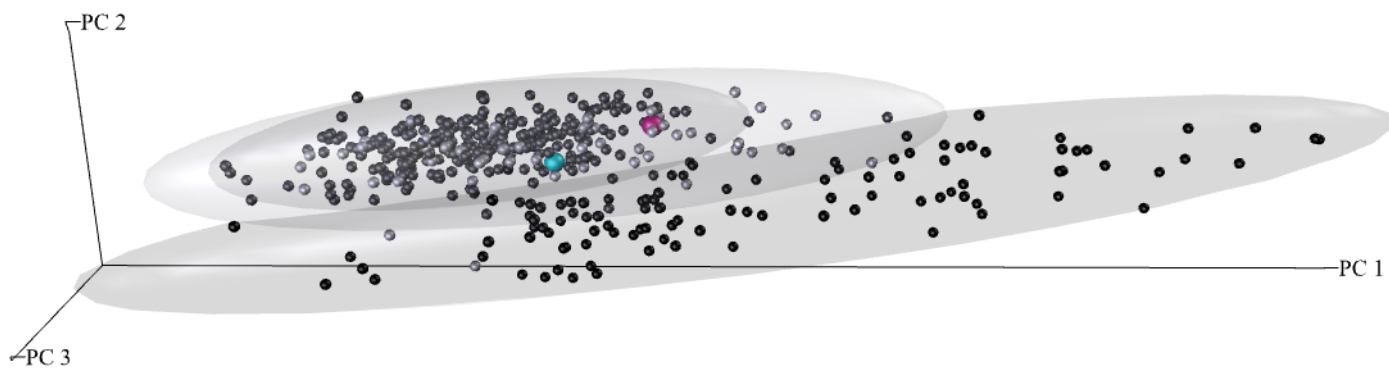

● Alaskan Wolves ● Dogs ● Eliseevichi MAE ● European Wolves ● Goyet

b

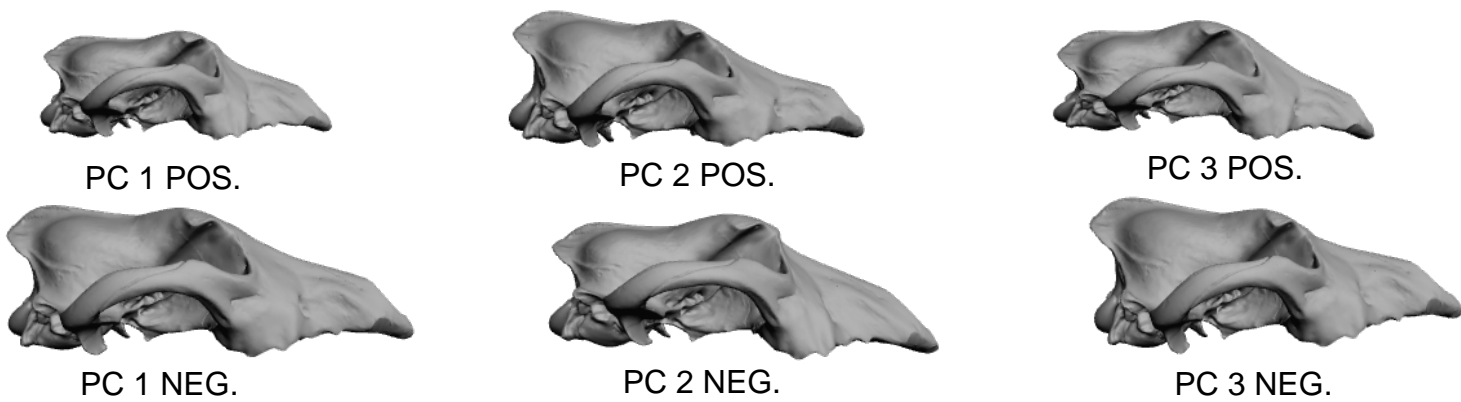

Supplement: srep08299-s4.pdf [file srep08299-s4.pdf]
